# Supplementary material for: Excitonic Zeeman splittings in colloidal CdSe quantum dots doped with single magnetic impurities
Source: Royal Society of Chemistry journal article supplement (doi:10.1039/c7tc01007a), 2017-01-01
Supplement: c7tc01007a1.pdf [file c7tc01007a1.pdf]

*Electronic Supplementary Information*

# Excitonic Zeeman Splittings in Colloidal CdSe Quantum Dots Doped with Single Magnetic Impurities

Charles J. Barrows, Rachel Fainblat, Daniel R. Gamelin\*

*Department of Chemistry, University of Washington, Seattle, WA 98195-1700*

Email: [gamelin@chem.washington.edu](mailto:gamelin@chem.washington.edu)

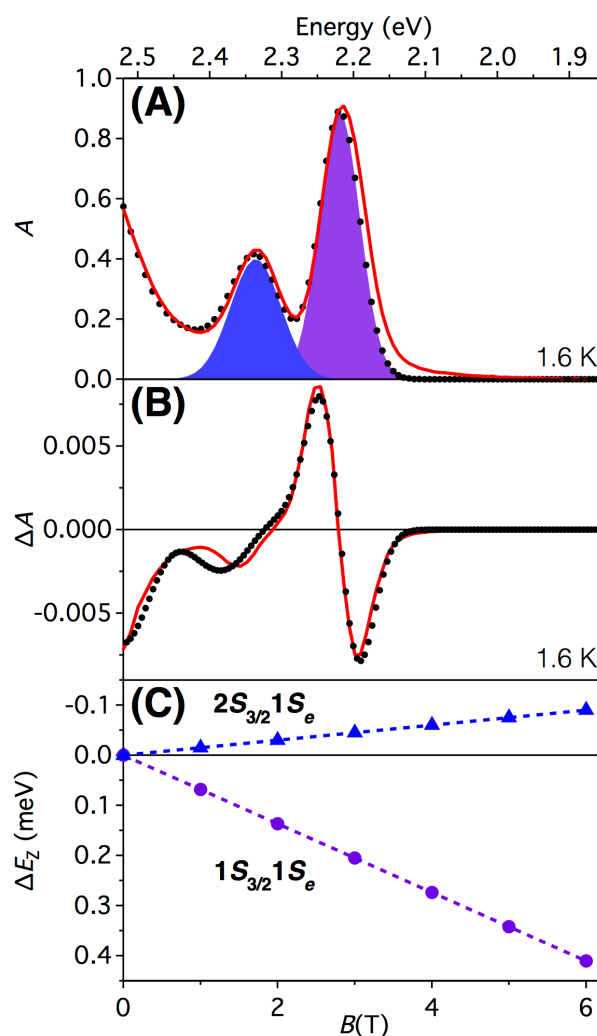

**Figure S-1.** (A) 1.6 K Electronic absorption and (B) 6 T MCD spectra (red lines) of undoped d ~4 nm CdSe QDs prepared according to the methods described in refs. 1,2. A simultaneous fit of the data to multiple Gaussian peaks (purple and blue curves shown for the first two excitonic transitions) yields the black dots. (C) Field-dependent Zeeman splittings of the first two excitonic transitions, displaying characteristic g values of +1.2 (1S<sub>3/2</sub>1S<sub>e</sub>; purple circles) and -0.3 (2S<sub>3/2</sub>1S<sub>e</sub>; blue triangles). MCD spectra at lower fields are omitted for clarity.

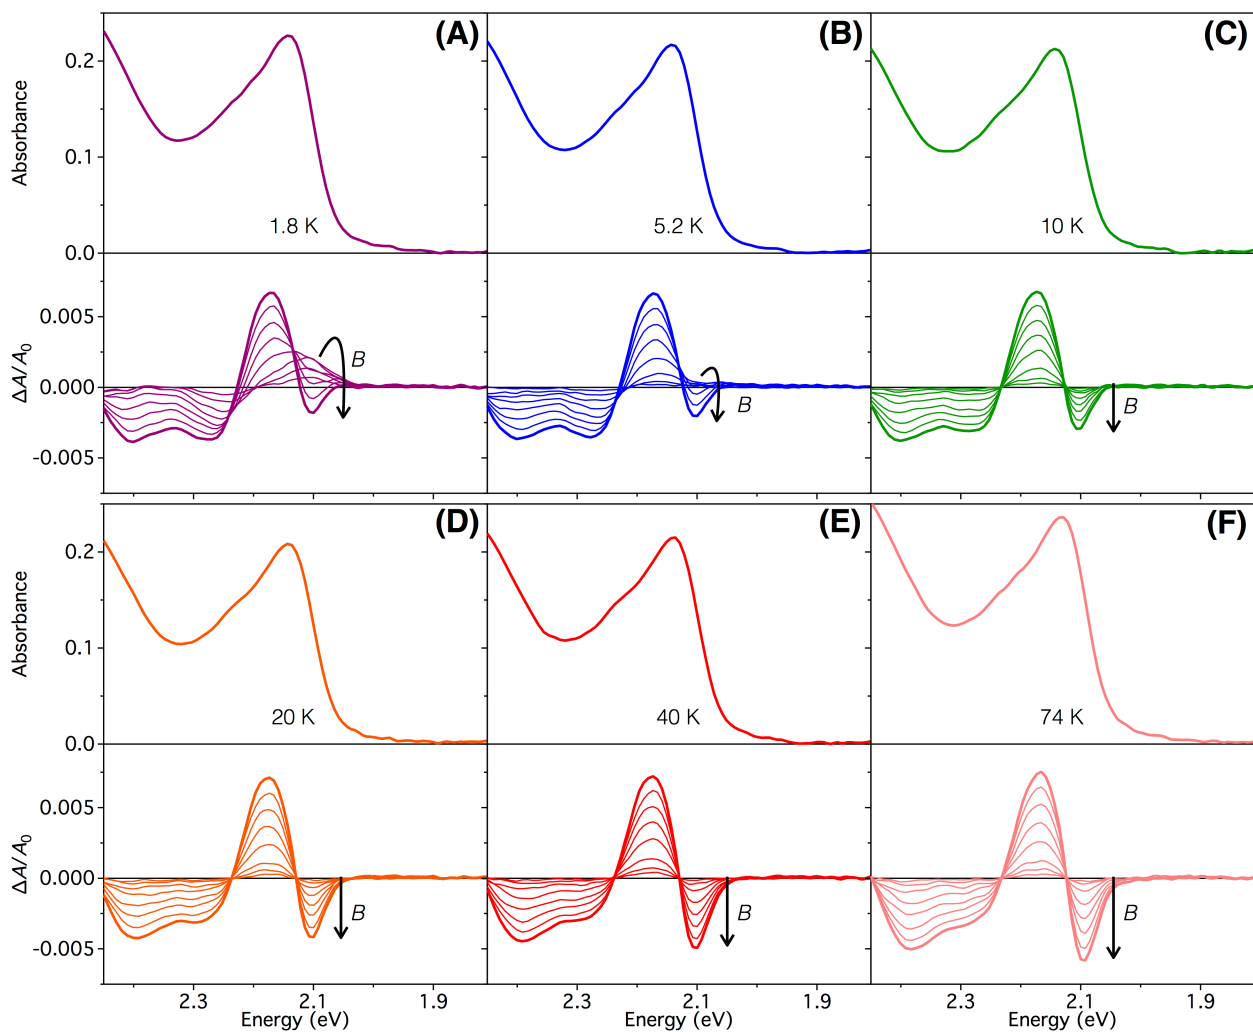

**Figure S-2.** Electronic absorption (top) and 0–6 T MCD (bottom) spectra of diffusion-doped  $d = 5.1$  nm  $\text{Cd}_{0.9997}\text{Mn}_{0.0003}\text{Se}$  QDs collected at 1.8 (A), 5.2 (B), 10 (C), 20 (D), 40 (E), and 74 K (F). The arrows indicate the direction of increasing magnetic field.

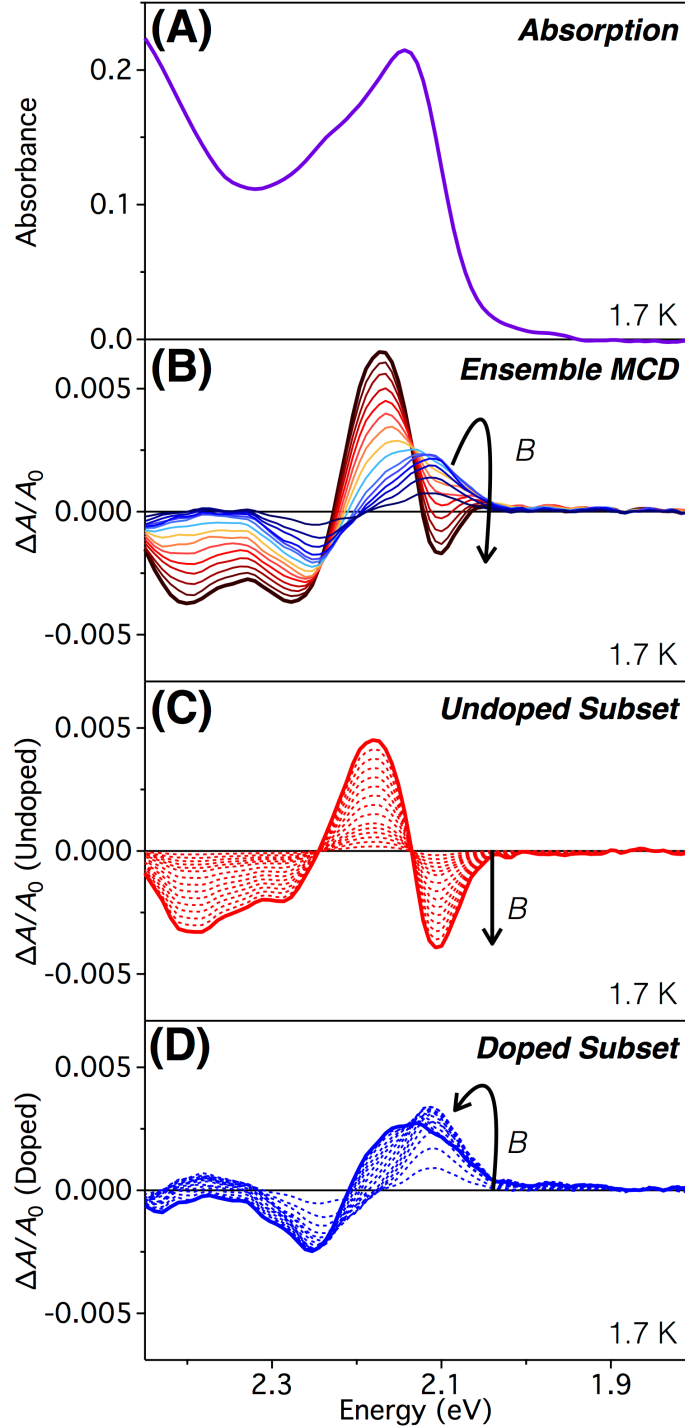

**Figure S-3.** (A) 1.7 K electronic absorption spectrum (purple) of diffusion-doped  $d = 5.1$  nm  $\text{Cd}_{0.9997}\text{Mn}_{0.0003}\text{Se}$  QDs (B) Variable-field (0–6 T; blue to red lines) MCD spectra of the same QDs at 1.7 K. (C) Deconvolved MCD spectra (red) of the undoped subset of this ensemble (67.8%), consisting of a purely intrinsic component to the excitonic Zeeman splittings. (D) Deconvolved MCD spectra (blue) of the doped subset of this ensemble (32.2%) consisting of both intrinsic and  $sp$ – $d$  exchange contributions to the excitonic Zeeman splittings. The arrows indicate the direction of increasing magnetic field.

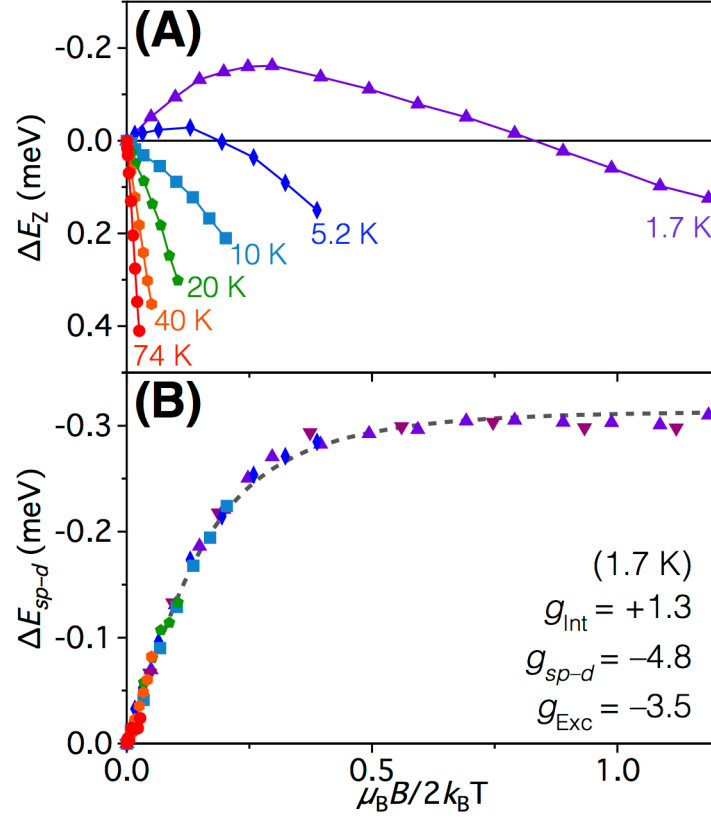

**Figure S-4. (A)** Excitonic Zeeman splittings of the  $1S_{3/2}1S_e$  transition in diffusion-doped  $d = 5.1$  nm  $\text{Cd}_{0.9997}\text{Mn}_{0.0003}\text{Se}$  QDs, determined from analysis of VT-VB MCD spectra (Figure 2B in the Main Text) **(B)** Brillouin saturation magnetization of the  $sp-d$  exchange contribution to the  $1S_{3/2}1S_e$  Zeeman splittings as determined from VT-VB MCD spectra. The values of  $g_{Int} = +1.3$  and  $g_{sp-d} = -4.8$  are calculated from the low-field (Curie) limit at 1.7 K for the  $1S_{3/2}1S_e$  transition. Data in purple upward triangles, maroon downward triangles, dark blue diamonds, light blue squares, green pentagons, orange hexagons, and red circles correspond to analysis of 0–6 T MCD spectra collected at 1.7, 1.8, 5.2, 10, 20, 40, and 74 K, respectively. The gray dashed line represents a fit of these data to Equation 3 of the main text.

**Table S1.**  $G$  values obtained from fitting the  $\Delta E_Z$  data of Figures 2–3 ( $\text{Cd}_{0.9997}\text{Mn}_{0.0003}\text{Se}$  QDs) and S-1 (undoped  $\text{CdSe}$  QDs) in the low-field (Curie) limit.

|            | $1S_{3/2}1S_e$ |                                                 | $2S_{3/2}1S_e$ |                                                 |
|------------|----------------|-------------------------------------------------|----------------|-------------------------------------------------|
|            | CdSe           | $\text{Cd}_{0.9997}\text{Mn}_{0.0003}\text{Se}$ | CdSe           | $\text{Cd}_{0.9997}\text{Mn}_{0.0003}\text{Se}$ |
| $g_{Int}$  | +1.2           | +1.3                                            | −0.3           | −0.2                                            |
| $g_{sp-d}$ | 0              | −4.8                                            | 0              | −3.6                                            |

## References

- (1) Vlaskin, V. A.; Barrows, C. J.; Erickson, C. S.; Gamelin, D. R., Nanocrystal Diffusion Doping. *J. Am. Chem. Soc.* **2013**, *135*, 14380–14389.
- (2) Barrows, C. J.; Chakraborty, P.; Kornowske, L. M.; Gamelin, D. R., Tuning Equilibrium Compositions in Colloidal  $\text{Cd}_{1-x}\text{Mn}_x\text{Se}$  Nanocrystals Using Diffusion Doping and Cation Exchange. *ACS Nano* **2016**, *10*, 910–918.
